# Supplementary material for: Mitogen-like Cerium-Based Nanoparticles Protect Schmidtea mediterranea against Severe Doses of X-rays
Source: MDPI journal article supplement (doi:10.3390/ijms24021241), 2023-01-08
Supplement: s1 [file s1]

**Table S1.** The primers of studied genes in neoblasts subpopulations analyzed by real time (RT) PCR.

| Assembly name <sup>a)</sup> | Clone or gene name | Primer F (5'-3')            | Primer R (5'-3')             |
|-----------------------------|--------------------|-----------------------------|------------------------------|
| comp1253_c0_seq1            | Smed-zfp-1         | GCTTCACTCAAAGATCAAATCTACAGA | TTAGAGCAAACCTCCACATTTGTATGG  |
| comp2038_c0_seq1            | Smed-fgfr-1        | CATCCAATAAGTGCGCTTCTCTT     | CAGTGGGAACTCCAGAATTGAAA      |
| comp2658_c0_seq1            | Smed-soxP-3        | CTGTCGATTGGCTGGAAACC        | CCGGCCTCGATCAATTACAA         |
| comp3849_c0_seq4            | Smed-egr-1         | GCCGTGTCCGCTCATCAG          | CGGCGAGAAGCCTTATTCCT         |
| comp1153_c0_seq1            | Smed-soxP-1        | GCTGAGAACGCCTGAGACTATAAAA   | TGAATCTAGGAATAACAGCCAATTAGG  |
| comp1412_c0_seq1            | Smed-nlk-1         | CCCAAGAGGTTGTGACCCAATA      | CCACATGTGACAGCGAATG          |
| comp1749_c0_seq1            | Smed-soxP-2        | CGATTGATATAATCTGTCATGCTGTTG | CACGCCCTGAATACGACATTG        |
| comp3519_c0_seq6            | Smed-fgfr-4        | GCCAAAAAACCACATTTACCA       | CTTTGACGAAATCATGCACATTAGA    |
| comp3740_c0_seq1            | Smed-inx-13        | TTGTTCCAGGGCGTTTCG          | CCTCTCCGGCAAAGATTGG          |
| comp4155_c0_seq1            | Smed-smad6/7       | GACTGACGACAACTGGAAATCG      | CTTTAGCAGCATCCAGTGCAATT      |
| comp9026_c0_seq1            | Smed-soxB-1        | CACCAGCTTGGCAGAGAGATG       | GCATAACCGGACGCCAGAT          |
| comp986_c0_seq1             | Smed-pbx-1         | CCGCTCAAATAAATTCGGAAGAT     | TCCAGTTACACCTTCAGCAATAAGC    |
| comp2057_c0_seq1            | Smed-gata456       | TGTGTGAACTGTGGAGCTAGCAA     | TTGAGAGAACCTGTTCGCATTCAT     |
| comp3137_c0_seq1            | Smed-hnf4          | CGACGCGTTAGACGCATAGAC       | GCTTCCTCGATGCAATATCCAT       |
| comp4402_c0_seq1            | Smed-prox-1        | TCATTTACGAAAGGCCAAACTTATG   | TTGTAGAACGTGATATCAGGAAAATAGC |

<sup>a)</sup> (Genes of markers neoblasts subpopulations: cyan – the  $\zeta$ -class, light cyan – the  $\sigma$ -class, yellow – the  $\gamma$ -class)

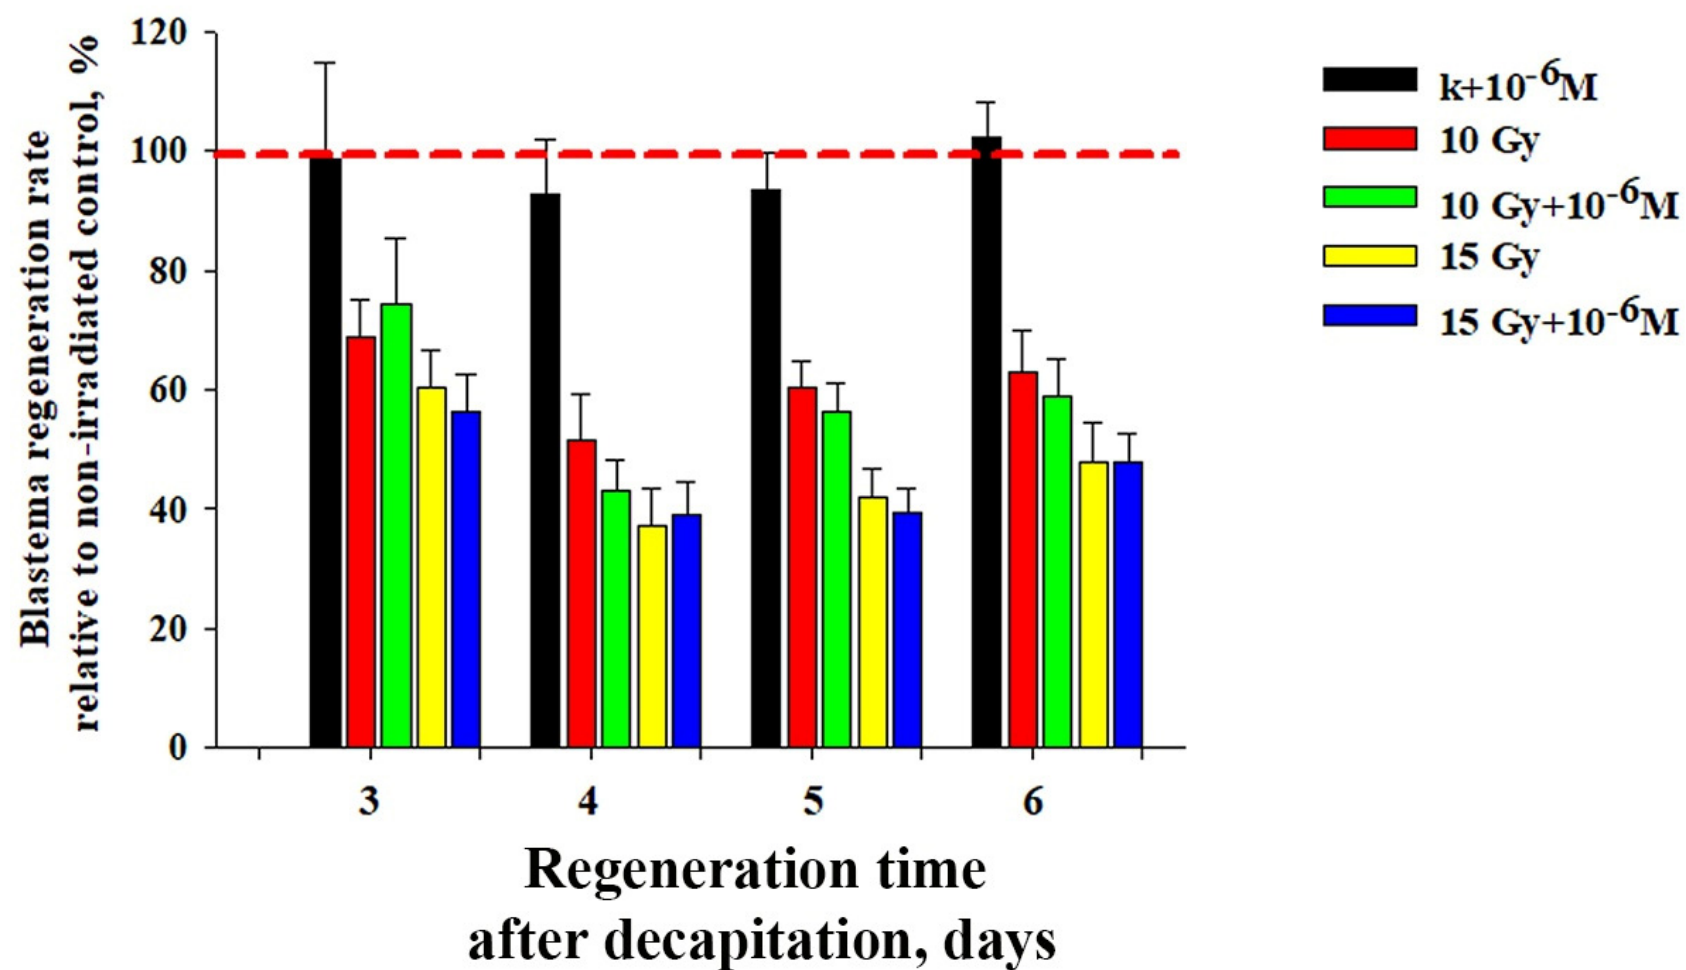

**Figure S1.** Analysis of the effect of cerium chloride on the rate of regeneration of irradiated planarians. M±SD, n=90.
